# Supplementary material for: The Cotton Mealybug Is Spreading along the Mediterranean: First Pest Detection in Italian Tomatoes
Source: MDPI journal article supplement (doi:10.3390/insects12080675), 2021-07-27
Supplement: s1 [file s1]

**Table S1.** Selected *Phenacoccus solenopsis* mtCOI sequences retrieved in GenBank (January 2021) used for phylogenetic analyses.

| Location                                   | Host plant                                                                 | NCBI<br>Accession<br>number |
|--------------------------------------------|----------------------------------------------------------------------------|-----------------------------|
| China: Guangdong                           | <i>Justicia gendarussa</i> (Acanthaceae)                                   | KF878063.1                  |
| Pakistan                                   | Unknow                                                                     | KF878060.1                  |
| China: Guangxi                             | <i>Justicia gendarussa</i> (Acanthaceae)                                   | KF878058.1                  |
| USA: California                            | Unknow                                                                     | KF878044.1                  |
| USA: California                            | Unknow                                                                     | KF878037.1                  |
| Brazil                                     | Unknow                                                                     | MH260234.1                  |
| Australia                                  | Unknow                                                                     | MH260233.1                  |
| India                                      | Unknow                                                                     | MH260226.1                  |
| Thailand                                   | Unknow                                                                     | MH260225.1                  |
| Pakistan                                   | Unknow                                                                     | MH260224.1                  |
| USA                                        | Unknow                                                                     | MH260221.1                  |
| Egypt                                      | Unknow                                                                     | MH260217.1                  |
| USA                                        | Unknow                                                                     | MH260210.1                  |
| Turkey                                     | Unknow                                                                     | MH260209.1                  |
| Vietnam: Hanoi                             | <i>Justicia gendarussa</i> (Acanthaceae)                                   | KJ187588.1                  |
| USA: Carolina                              | Unknow                                                                     | KJ187586.1                  |
| China: Hainan                              | <i>Hibiscus rosa-sinensis</i> (Malvaceae)                                  | KJ187585.1                  |
| Pakistan: Baluchistan Naseer Abad district | <i>Gossipium hirsutum</i> (Malvaceae)                                      | KJ995914.1                  |
| Philippines: Tarlac City                   | <i>Hibiscus rosa-sinensis</i> (Malvaceae)                                  | KF442959.1                  |
| Vietnam: Ha Noi City                       | <i>Justicia gendarussa</i> (Acanthaceae)                                   | KF442956.1                  |
| Pakistan: Multan City                      | <i>Hibiscus rosa-sinensis</i> (Malvaceae)                                  | KF442955.1                  |
| China: Guangxi, Hubei, Guangdong           | <i>Hibiscus rosa-sinensis</i> and<br><i>Gossipium hirsutum</i> (Malvaceae) | KJ620516.1                  |
| Israel: Arava Valley                       | <i>Hibiscus mutabilis</i> (Malvaceae)                                      | KT369526.1                  |
| Turkey: Adana                              | <i>Lycopersicon esculentum</i> (Solanaceae)                                | KT369524.1                  |
| Pakistan                                   | <i>Gossipium hirsutum</i> (Malvaceae)                                      | AB499696.1                  |
| USA: Florida                               | Unknow                                                                     | EU267208.1                  |
